# Supplementary material
Source: PubMed Central journal article supplement (PMC2680387)
Supplement: NIHMS24287-supplement-01.pdf [file NIHMS24287-supplement-01.pdf]

**Supplemental Table 1:** Summary of structural homology<sup>1</sup> search for the C-terminal RpoN domain of  $\sigma^{54}$  bound to the -24 promoter element

| <b>Homologous Proteins<br/>(residues)</b>                                                   | <b>Z Score<br/>(R.M.S.D. [Å])</b> | <b>DNA binding<br/>motif</b> | <b>PDB ID</b>     |
|---------------------------------------------------------------------------------------------|-----------------------------------|------------------------------|-------------------|
| The Z $\alpha$ domain of the human ADAR1 enzyme (134-187)                                   | 5.5 (2.0)                         | winged-HTH                   | 1QBJ <sup>1</sup> |
| N-terminal domain of <i>Methanococcus jannashii</i> DNA topoisomerase VI A subunit (72-136) | 5.3 (2.5)                         | winged-HTH                   | 1D3Y <sup>2</sup> |
| N-terminal domain of the <i>Bacillus stearothermophilus</i> arginine repressor (4-55)       | 5.1 (2.0)                         | winged-HTH                   | 1B4A <sup>3</sup> |
| N-terminal domain of <i>Pseudomonas aeruginosa</i> ferric uptake regulator (14-84)          | 5.0 (2.9)                         | winged-HTH                   | 1MZB <sup>4</sup> |
| N-terminal domain of <i>Pyrococcus furiosus</i> leucine-response regulator (2-52)           | 4.9 (2.8)                         | HTH                          | 1ILG <sup>5</sup> |
| $\sigma^3$ domain of <i>Thermus aquaticus</i> $\sigma^A$ (277-330)                          | 4.4 (2.6)                         | HTH                          | 1KU2 <sup>6</sup> |

## References

1. Schwartz, T., Rould, M. A., Lowenhaupt, K., Herbert, A. & Rich, A. (1999). Crystal structure of the Z $\alpha$  domain of the human editing enzyme ADAR1 bound to left-handed Z-DNA. *Science* 284, 1841-5.
2. Nichols, M. D., DeAngelis, K., Keck, J. L. & Berger, J. M. (1999). Structure and function of an archaeal topoisomerase VI subunit with homology to the meiotic recombination factor Spo11. *Embo J* 18, 6177-88.
3. Ni, J., Sakanyan, V., Charlier, D., Glansdorff, N. & Van Duyne, G. D. (1999). Structure of the arginine repressor from *Bacillus stearothermophilus*. *Nat Struct Biol* 6, 427-32.
4. Pohl, E., Haller, J. C., Mijovilovich, A., Meyer-Klaucke, W., Garman, E. & Vasil, M. L. (2003). Architecture of a protein central to iron homeostasis: crystal structure and spectroscopic analysis of the ferric uptake regulator. *Mol Microbiol* 47, 903-15.

<sup>1</sup> The structures with the top five DALI Z scores (for the RpoN domain only) are listed, as well as the highest scoring fragment of a  $\sigma^{70}$ -type protein.s

5. Leonard, P. M., Smits, S. H., Sedelnikova, S. E., Brinkman, A. B., de Vos, W. M., van der Oost, J., Rice, D. W. & Rafferty, J. B. (2001). Crystal structure of the Lrp-like transcriptional regulator from the archaeon *Pyrococcus furiosus*. *Embo J* 20, 990-7.
6. Campbell, E. A., Muzzin, O., Chlenov, M., Sun, J. L., Olson, C. A., Weinman, O., Trester-Zedlitz, M. L. & Darst, S. A. (2002). Structure of the bacterial RNA polymerase promoter specificity sigma subunit. *Mol Cell* 9, 527-39.
